# Supplementary material
Source: PubMed Central journal article supplement (PMC3298143)
Supplement: supp_78.6.1953_AEM7161-11_TableS1.pdf [file supp_78.6.1953_AEM7161-11_TableS1.pdf]

TABLE S1. Microbial strains employed in the present study

| Species                               | Strain(s)                                           | Origin            |
|---------------------------------------|-----------------------------------------------------|-------------------|
| <i>Lactobacillus brevis</i>           | ATCC <sup>a</sup> 367                               | Silage            |
| <i>Lactobacillus brevis</i>           | IOEB <sup>b</sup> 9906, 9907, 9908, 9910, 9925      | Sugarcane         |
| <i>Lactobacillus buchneri</i>         | LTH <sup>c</sup> 1388, 2515                         | Cheese            |
| <i>Lactobacillus buchneri</i>         | DSMZ <sup>d</sup> 5987                              | Cheese            |
| <i>Lactobacillus buchneri</i>         | ATCC 11305                                          | Beer              |
| <i>Lactobacillus casei</i>            | ATCC 334                                            | Cheese            |
| <i>Lactobacillus casei</i>            | IOEB 9914, 9915, 9916, 9919, 9920                   | Sugarcane         |
| <i>Lactobacillus fermentum</i>        | IOEB 9909, 9912                                     | Sugarcane         |
| <i>Lactobacillus gasseri</i>          | ATCC 33323                                          | Human             |
| <i>Lactobacillus hilgardii</i>        | ATCC 8290, 27304                                    | Wine              |
| <i>Lactobacillus plantarum</i>        | IOEB 9911, 9917, 9918, 9921, 9922, 9923, 9924, 9926 | Sugarcane         |
| <i>Lactobacillus sakei</i>            | LTH 2076                                            | Sauerkraut        |
| <i>Lactobacillus sakei</i>            | ATCC 15521                                          | Fermented rice    |
| <i>Lactobacillus sanfranciscensis</i> | ATCC 27651                                          | Cheese            |
| <i>Lactobacillus</i> sp. 30a          | ATCC 33222                                          | Horse stomach     |
| <i>Leuconostoc mesenteroides</i>      | ATCC 8293                                           | Olives            |
| <i>Oenococcus oeni</i>                | IOEB 9915, 89006                                    | Wine              |
| <i>Pediococcus damnosus</i>           | ATCC 25248                                          | Beer              |
| <i>Pediococcus damnosus</i>           | ATCC 25249                                          | Beer              |
| <i>Pediococcus dextrinicus</i>        | ATCC 33087                                          | Silage            |
| <i>Pediococcus parvulus</i>           | ATCC 19371                                          | Silage            |
| <i>Pediococcus pentosaceus</i>        | ATCC 33316                                          | Beer              |
| <i>Pediococcus pentosaceus</i>        | IOEB 9904                                           | Sugarcane         |
| <i>Tetragenococcus muriaticus</i>     | LMG <sup>e</sup> 18490                              | Squid liver sauce |

<sup>a</sup>ATCC: American Type Culture Collection (Manassas, VA).

<sup>b</sup>IOEB: Institut d'Œnologie de Bordeaux (Bordeaux, France) .

<sup>c</sup>LTH: Institut für Lebensmittelstechnologie (Hohenheim, Germany).

<sup>d</sup>DSMZ: Deutsche Sammlung von Mikroorganismen und Zellkulturen (Braunschweig, Germany).

<sup>e</sup>LMG: Belgian Coordinated Cultures of Microorganisms (Gent, Belgium).
